# Supplementary material for: A magnetically separable and recyclable g-C3N4/Fe3O4/porous ruthenium nanocatalyst for the photocatalytic degradation of water-soluble aromatic amines and azo dyes
Source: Royal Society of Chemistry journal article supplement (doi:10.1039/c9ra08631e), 2020-01-01
Supplement: c9ra08631e1.pdf [file c9ra08631e1.pdf]

## Supporting Information

### **A magnetically separable and recyclable $g\text{-C}_3\text{N}_4/\text{Fe}_3\text{O}_4$ /porous ruthenium nanocatalyst for the photocatalytic degradation of water-soluble aromatic amines and azo-dyes**

Anupam Sahoo and Srikanta Patra\*

School of Basic Sciences, Indian Institute of Technology Bhubaneswar, Argul, Jatni-752050, Orissa, India  
E-mail; [srikanta@iitbbs.ac.in](mailto:srikanta@iitbbs.ac.in).

## Table of content

| Sr. No. | Description                                                                                                                                                                                                                                                                                                                                                                                    | Page No. |
|---------|------------------------------------------------------------------------------------------------------------------------------------------------------------------------------------------------------------------------------------------------------------------------------------------------------------------------------------------------------------------------------------------------|----------|
| 1       | <b>Chart S1.</b> Chemical structure of aromatic amines used in this study.                                                                                                                                                                                                                                                                                                                     | S3       |
| 2       | <b>Chart S2.</b> Chemical structure of azo dyes used in this study.                                                                                                                                                                                                                                                                                                                            | S4       |
|         | <b>Table TS1.</b> Comparison between the present and other related nanocatalysts towards removal of aromatic amines.                                                                                                                                                                                                                                                                           | S5       |
| 3       | <b>Table TS2.</b> Catalytic reduction of azo dyes in presence of <i>g</i> -C <sub>3</sub> N <sub>4</sub> /Fe <sub>3</sub> O <sub>4</sub> / <i>p</i> -RuNP nanocomposites and NaBH <sub>4</sub> .                                                                                                                                                                                               | S7       |
| 4       | <b>Figure S1.</b> FE-SEM images of (a) <i>g</i> -C <sub>3</sub> N <sub>4</sub> nanosheet, (b) <i>g</i> -C <sub>3</sub> N <sub>4</sub> /Fe <sub>3</sub> O <sub>4</sub> NP and (c) <i>g</i> -C <sub>3</sub> N <sub>4</sub> /Fe <sub>3</sub> O <sub>4</sub> / <i>p</i> -RuNP nanocomposites and (d-f) their corresponding EDS spectra, respectively.                                              | S8       |
| 5       | <b>Figure S2.</b> SEM image (a) and mapping of (b) elemental C, (c) elemental N, (d) elemental O (e) elemental Fe and (f) elemental Ru of <i>g</i> -C <sub>3</sub> N <sub>4</sub> /Fe <sub>3</sub> O <sub>4</sub> / <i>p</i> -RuNP nanocomposite.                                                                                                                                              | S9       |
| 6       | <b>Figure S3.</b> Powder XRD patterns of <i>g</i> -C <sub>3</sub> N <sub>4</sub> nanosheet, <i>g</i> -C <sub>3</sub> N <sub>4</sub> /Fe <sub>3</sub> O <sub>4</sub> NP and <i>g</i> -C <sub>3</sub> N <sub>4</sub> /Fe <sub>3</sub> O <sub>4</sub> / <i>p</i> -RuNP nanocomposites.                                                                                                            | S10      |
| 7       | <b>Figure S4.</b> (a) N <sub>2</sub> adsorption-desorption isotherms and (b) pore size distribution of <i>g</i> -C <sub>3</sub> N <sub>4</sub> , <i>g</i> -C <sub>3</sub> N <sub>4</sub> /Fe <sub>3</sub> O <sub>4</sub> NP and <i>g</i> -C <sub>3</sub> N <sub>4</sub> /Fe <sub>3</sub> O <sub>4</sub> / <i>p</i> -RuNP nanocomposites.                                                       | S11      |
| 8       | <b>Figure S5.</b> (a) UV-Vis DRS spectra and (b) Tauc plot of <i>g</i> -C <sub>3</sub> N <sub>4</sub> , <i>g</i> -C <sub>3</sub> N <sub>4</sub> /Fe <sub>3</sub> O <sub>4</sub> NP and <i>g</i> -C <sub>3</sub> N <sub>4</sub> /Fe <sub>3</sub> O <sub>4</sub> / <i>p</i> -RuNP.                                                                                                               | S12      |
| 9       | <b>Figure S6.</b> Photocatalytic degradation of aniline (100 mg/L) by <i>g</i> -C <sub>3</sub> N <sub>4</sub> /Fe <sub>3</sub> O <sub>4</sub> / <i>p</i> -RuNP at (a) different pH (b) with varying ruthenium concentration and (c) varying aniline concentration after 24 h under LED.                                                                                                        | S13      |
| 10      | <b>Figure S7.</b> UV-Vis spectra and HPLC of aromatic amines (100 mg/L) and after degradation using visible light at pH 7.0 in presence of <i>g</i> -C <sub>3</sub> N <sub>4</sub> /Fe <sub>3</sub> O <sub>4</sub> / <i>p</i> -RuNP nanocatalyst (80 mg/L).                                                                                                                                    | S14      |
| 11      | <b>Figure S8.</b> Photograph of CR dye of varying concentration (a) before and (b) after photodegradation (1h) by <i>g</i> -C <sub>3</sub> N <sub>4</sub> /Fe <sub>3</sub> O <sub>4</sub> / <i>p</i> -RuNP nanocomposite and (c) the corresponding UV-Vis spectra.                                                                                                                             | S15      |
| 12      | <b>Figure S9.</b> UV-Vis spectra of degradation of various azo dyes (5 mg/L) under LED in presence of <i>g</i> -C <sub>3</sub> N <sub>4</sub> /Fe <sub>3</sub> O <sub>4</sub> / <i>p</i> -RuNP nanocatalyst (80 mg/L).                                                                                                                                                                         | S16      |
| 13      | <b>Figure S10.</b> HPLC of azo-dyes (5 mg/L) after and before the degradation using visible light at pH 7.0 in presence of <i>g</i> -C <sub>3</sub> N <sub>4</sub> /Fe <sub>3</sub> O <sub>4</sub> / <i>p</i> -RuNP (80 mg/L) nanocatalyst.                                                                                                                                                    | S17      |
| 14      | <b>Figure S11.</b> FTIR spectra of CR, <i>g</i> -C <sub>3</sub> N <sub>4</sub> /Fe <sub>3</sub> O <sub>4</sub> / <i>p</i> -RuNP nanocatalyst before and after photo-degradation of CR and the solution after complete degradation of CR.                                                                                                                                                       | S18      |
| 15      | <b>Figure S12.</b> (a, c, e and g) UV-Vis spectra of azo dyes before (i), after(ii) reduction and after photo-degradation (iii); (b, d, f and h) HPLC of aromatic amines of reduced dyes (200 mg/L) after and before degradation using visible light at pH 7.0 in presence of <i>g</i> -C <sub>3</sub> N <sub>4</sub> /Fe <sub>3</sub> O <sub>4</sub> / <i>p</i> -RuNP nanocatalyst (80 mg/L). | S19      |
| 16      | <b>Figure S13.</b> Reusability of <i>g</i> -C <sub>3</sub> N <sub>4</sub> /Fe <sub>3</sub> O <sub>4</sub> / <i>p</i> -RuNP nanocatalyst towards aniline (100 mg/L) degradation under visible (LED) light.                                                                                                                                                                                      | S20      |
| 17      | <b>Figure S14.</b> (a) UV-Vis spectra of CR after treatment of <i>g</i> -C <sub>3</sub> N <sub>4</sub> /Fe <sub>3</sub> O <sub>4</sub> / <i>p</i> -RuNP nanocatalyst in the presence of different radical scavengers under LED light.                                                                                                                                                          | S21      |
| 18      | <b>References</b>                                                                                                                                                                                                                                                                                                                                                                              | S22      |

**Chart S1.** Chemical structure of aromatic amines used in this study.

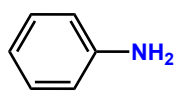

**aniline**

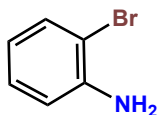

**2-bromoaniline**

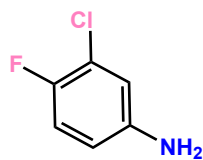

**3-chloro-4-fluoroaniline**

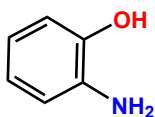

**2-aminophenol**

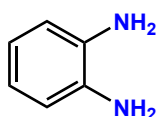

**benzene-1,2-diamine**

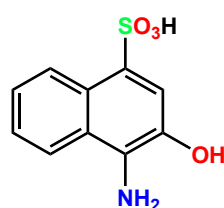

**4-amino-3-hydroxynaphthalene-1-sulfonic acid**

**Chart S2.** Chemical structure of azo dyes used in this study.

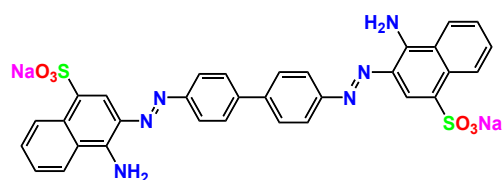

**Congo Red (CR)**

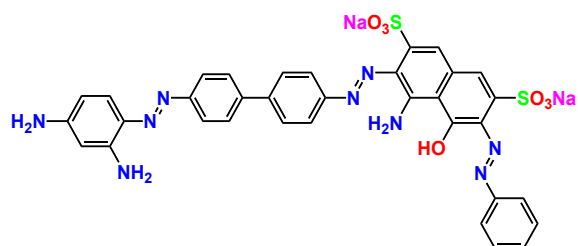

**Chlorazol Black (CB)**

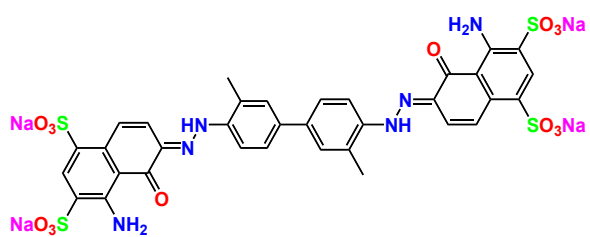

**Evans Blue (EB)**

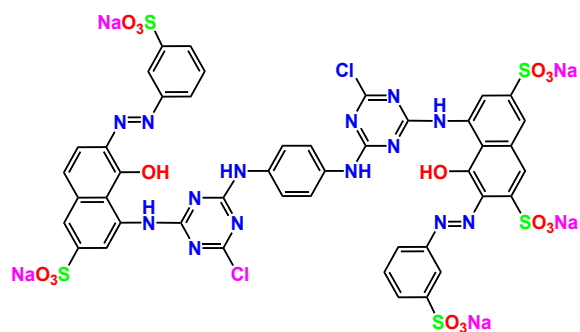

**Reactive Red 120 (RR-120)**

**Table TS1.** Comparison between the present and other related nanocatalysts towards removal of aromatic amines.

| Sl. No. | Title                                                                                                                                                           | Name of the enzyme/chemical/catalyst                                                                      | Aromatic amine/hydroxy compounds used                                                                                                             | Initial conc. of Dye/Aromatic amines    | Medium/Buffer/temperature./pH | % removal                                  |
|---------|-----------------------------------------------------------------------------------------------------------------------------------------------------------------|-----------------------------------------------------------------------------------------------------------|---------------------------------------------------------------------------------------------------------------------------------------------------|-----------------------------------------|-------------------------------|--------------------------------------------|
| 1       | Chemical degradation of aromatic amines by <b>Fenton's reagent</b> <sup>1</sup>                                                                                 | <b>Fenton's reagent</b> [Fe(II) + H <sub>2</sub> O <sub>2</sub> ] (100-500 mg/L)                          | o-dianisidine, 1-naphthylamine, 2-naphthylamine, 3,3'-dichlorobenzidine, p-anisidine, 4-chloroaniline, 2,4-iaminotoluene, o-tolidine and aniline. | 0.0003 mM                               | pH 4.5-5.5                    | 100                                        |
| 2       | Removal of aromatic amines and decolourisation of azo dye baths by <b>electrochemical treatment</b> <sup>2</sup>                                                | <b>Electrochemical treatment</b> 20 g of diatomaceous earth (90% SiO <sub>2</sub> )                       | aniline, o-toluidine, 4-chloroaniline and 4-aminobiphenyl                                                                                         | 300 mg/L Dye and 10mg/L Aromatic amines |                               | 90                                         |
| 3       | <b>Chemical coagulation and sonolysis</b> for total aromatic amines removal from anaerobically pre-treated textile wastewater: A comparative study <sup>3</sup> | <b>Chemical coagulation, sonolysis</b> Magnesium chloride aided with aluminium chlorohydrate (1800 mg /L) | Azo dyes (CR, RB 5, Disperse blue 3)<br>Aromatic amine: <b>Benzidine, sulfonic acid</b>                                                           | 200 mg/L                                | pH 7.0                        | 85 (AAs)<br>52<br>(Decolonization of dyes) |
| 4       | <b>Horseradish peroxidase</b> for the removal of carcinogenic aromatic amines from water <sup>4</sup>                                                           | <b>Horseradish peroxidase</b> (100U/L) and hydrogen peroxide(1M)                                          | o-tolidine, and 2-naphthylamine; from Aldrich, 1-naphthylamine, 4-aminobiphenyl, pphenylazoaniline, aniline, p-toluidine                          | 100mg/L                                 | pH 5.0                        | 99                                         |
| 5       | Removal of direct azo dyes and aromatic amines from aqueous solutions using <b>two - cyclodextrin-based polymers</b> <sup>5</sup>                               | <b>b-Cyclodextrin</b> (b-CD) (2.5 g/L)                                                                    | benzidine, p-chloroaniline and -naphthalamine                                                                                                     | 0.001 mM                                | pH 7.0                        | >85                                        |
| 6       | Removal efficiency of a <b>calix[4]arene-based polymer</b> for water-soluble carcinogenic direct azo dyes and aromatic amines <sup>6</sup>                      | <b>calix[4]arenes derivative</b> (2.5 g/L)                                                                | Azo dyes and aromatic amines (benzidine, p-chloroaniline, -naphthalamine)                                                                         | 0.001 mM                                | pH 2.0                        | >90                                        |

|   |                                                                                                                                                                                |                                                                                                               |                                                       |       |                                             |        |                                                                               |
|---|--------------------------------------------------------------------------------------------------------------------------------------------------------------------------------|---------------------------------------------------------------------------------------------------------------|-------------------------------------------------------|-------|---------------------------------------------|--------|-------------------------------------------------------------------------------|
| 7 | A porous trimetallic Au@Pd@Ru nanoparticle system: synthesis, characterisation and efficient dye degradation and removal <sup>7</sup>                                          | Porous Au@Pd@Ru Dolochar(150g/L)                                                                              | Benzidine,benzidine, aminophenol and dimethoxyaniline | 4-3,4 | Dye and Aromatic amines= 1mM                | pH=7.0 | >90                                                                           |
| 8 | A Combined Process for the Degradation of Azo-Dyes and Efficient Removal of Aromatic Amines Using Porous Silicon Supported Porous Ruthenium Nanocatalyst <sup>8</sup>          | Porous silicon@porous ruthenium(8 mL in 1 L) and H <sub>2</sub> O <sub>2</sub> (1M) (amount of Ru ≈ 3.39 ppm) | Azo dyes and aromatic amines                          |       | Dye and Aromatic amines= 1mM                | pH=5.0 | 46-99                                                                         |
| 9 | A magnetically separable and recyclable porous Ruthenium nanocatalyst for the photocatalytic degradation of water-soluble aromatic amines and azo-dyes <sup>Present Work</sup> | 80 mg/L<br>100 W, visible LED light<br>(amount of Ru ≈ 3.44 ppm)                                              | Azo dyes and aromatic amines                          |       | Dye(200mg /L) Aromatic amines (100-200mg/L) | pH 7.0 | The percentage varies from 67-99 And the catalyst is recyclable several times |

**Table TS2.** Catalytic reduction of azo dyes in presence of *g*-C<sub>3</sub>N<sub>4</sub>/Fe<sub>3</sub>O<sub>4</sub>/*p*-RuNP nanocomposites and NaBH<sub>4</sub>.

| Sr. No | Name of the dye/amine | Concentration | Catalyst (per 10 mL) | Time of reaction | Removal efficiency |
|--------|-----------------------|---------------|----------------------|------------------|--------------------|
| 1      | <b>CR</b>             | 5 mg/L        | 200 $\mu$ L          | 1 h              | 100 %              |
| 2      | <b>CB</b>             | 5 mg/L        | 200 $\mu$ L          | 1 h              | 100 %              |
| 3      | <b>EB</b>             | 5 mg/L        | 200 $\mu$ L          | 18 h             | 100%               |
| 4      | <b>RR-120</b>         | 5 mg/L        | 200 $\mu$ L          | 2 h              | 98%                |

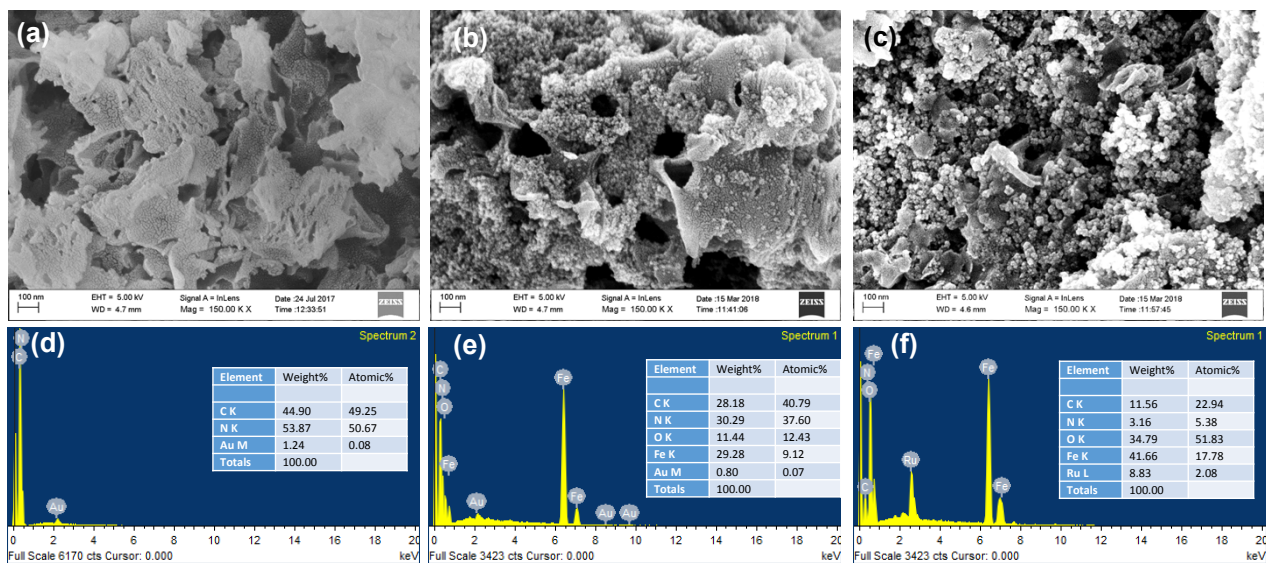

**Figure S1.** FE-SEM images of (a)  $g\text{-C}_3\text{N}_4$  nanosheet, (b)  $g\text{-C}_3\text{N}_4/\text{Fe}_3\text{O}_4\text{NP}$  and (c)  $g\text{-C}_3\text{N}_4/\text{Fe}_3\text{O}_4/p\text{-RuNP}$  nanocomposites and (d-f) their corresponding EDS spectra, respectively.



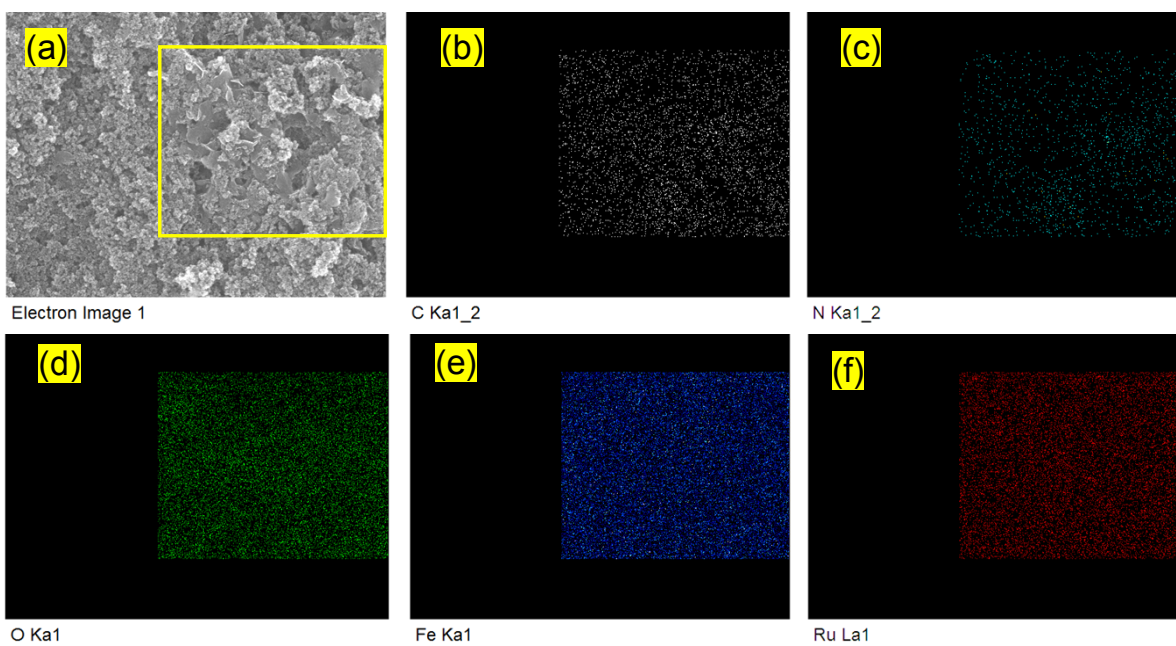

**Figure S2.** SEM image (a) and mapping of (b) elemental C, (c) elemental N, (d) elemental O (e) elemental Fe and (f) elemental Ru of  $g\text{-C}_3\text{N}_4/\text{Fe}_3\text{O}_4/p\text{-RuNP}$  nanocomposite.

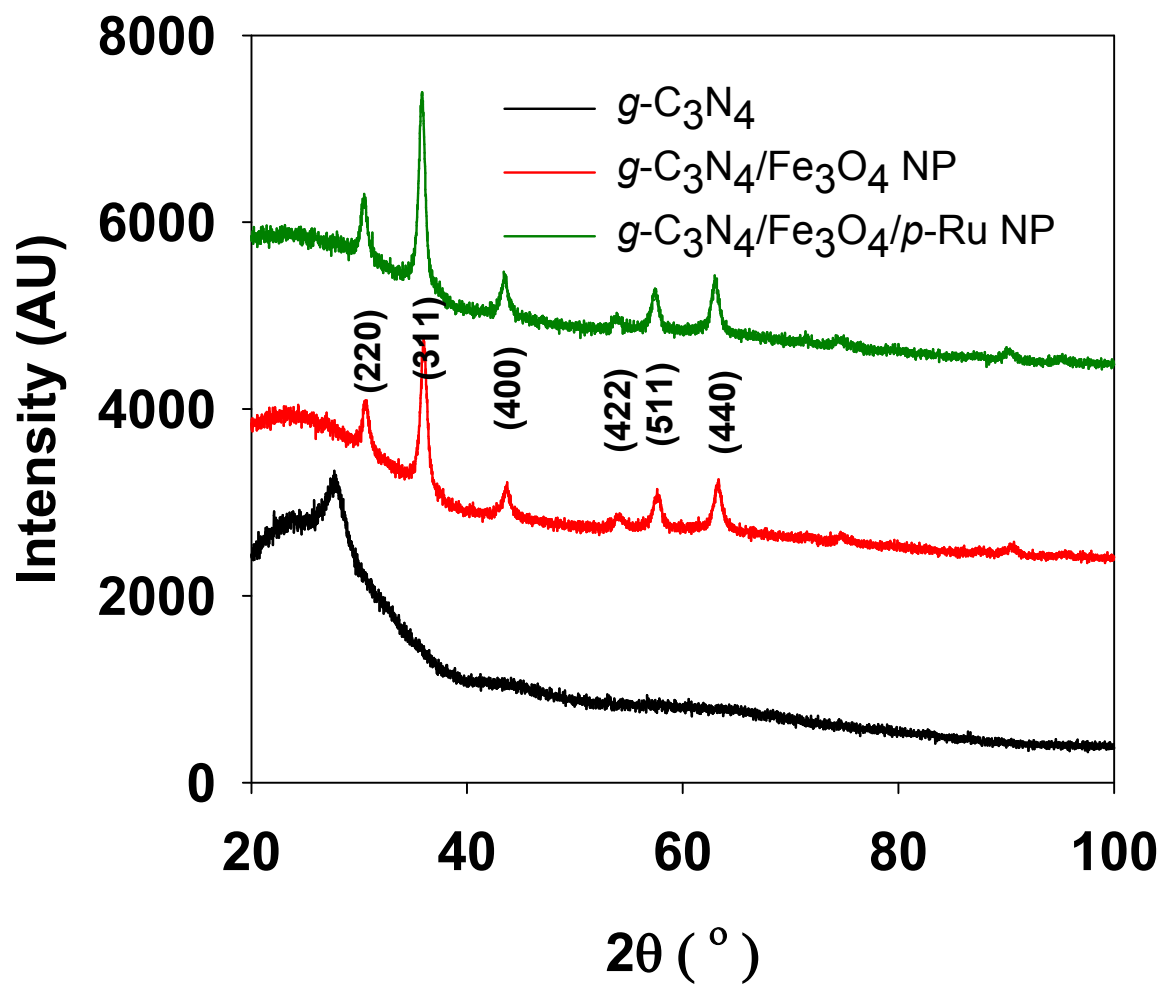

**Figure S3.** Powder XRD patterns of *g*-C<sub>3</sub>N<sub>4</sub> nanosheet, *g*-C<sub>3</sub>N<sub>4</sub>/Fe<sub>3</sub>O<sub>4</sub>NP and *g*-C<sub>3</sub>N<sub>4</sub>/Fe<sub>3</sub>O<sub>4</sub>/*p*-RuNP nanocomposites.

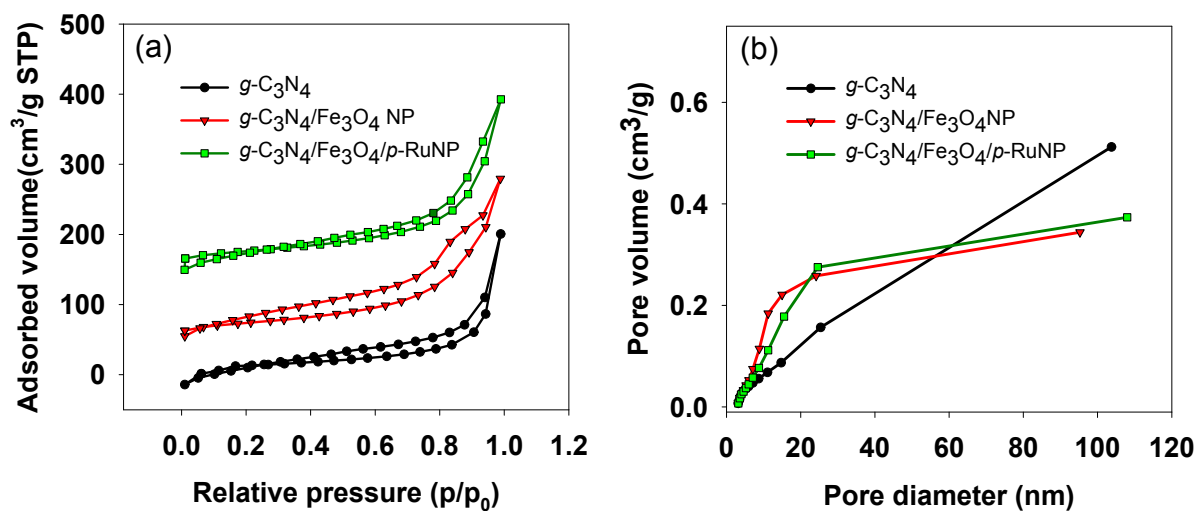

**Figure S4.** (a)  $\text{N}_2$  adsorption-desorption isotherms and (b) pore size distribution of  $g\text{-C}_3\text{N}_4$ ,  $g\text{-C}_3\text{N}_4/\text{Fe}_3\text{O}_4\text{NP}$  and  $g\text{-C}_3\text{N}_4/\text{Fe}_3\text{O}_4/p\text{-RuNP}$  nanocomposites.

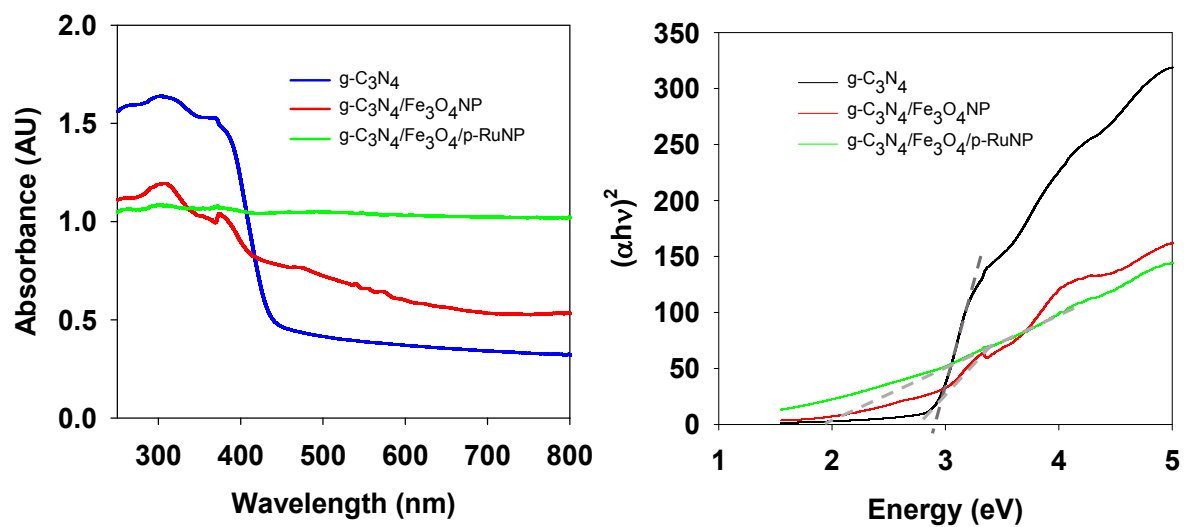

**Fig. S5.** (a) UV-Vis DRS spectra and (b) Tauc plot of  $g\text{-C}_3\text{N}_4$ ,  $g\text{-C}_3\text{N}_4/\text{Fe}_3\text{O}_4\text{NP}$  and  $g\text{-C}_3\text{N}_4/\text{Fe}_3\text{O}_4/p\text{-RuNP}$ .

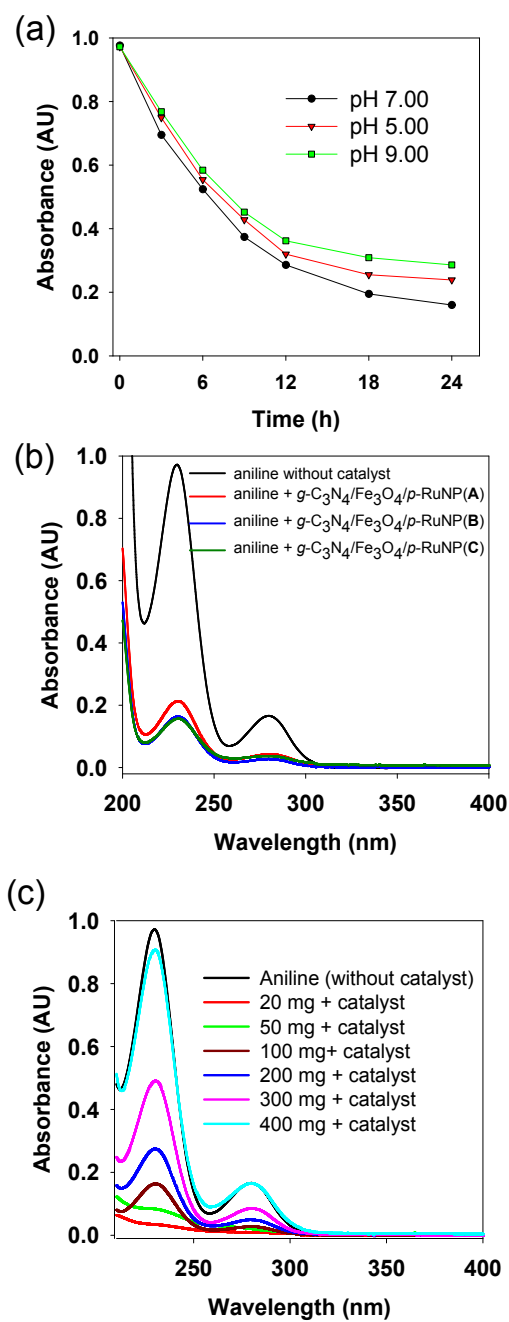

**Figure S6.** Photocatalytic degradation of aniline (100 mg/L) by  $g\text{-C}_3\text{N}_4/\text{Fe}_3\text{O}_4/p\text{-RuNP}$  at (a) different pH (b) with varying ruthenium concentration and (c) varying aniline concentration after 24 h under LED.

\* catalysts were taken 80 mg containing 3.44 ppm of  $\text{Ru}^0$ ; The catalysts **A**, **B** and **C** were prepared by taking 5 mM, 10 mM and 20 mM  $\text{RuCl}_3 \cdot n\text{H}_2\text{O}$ .

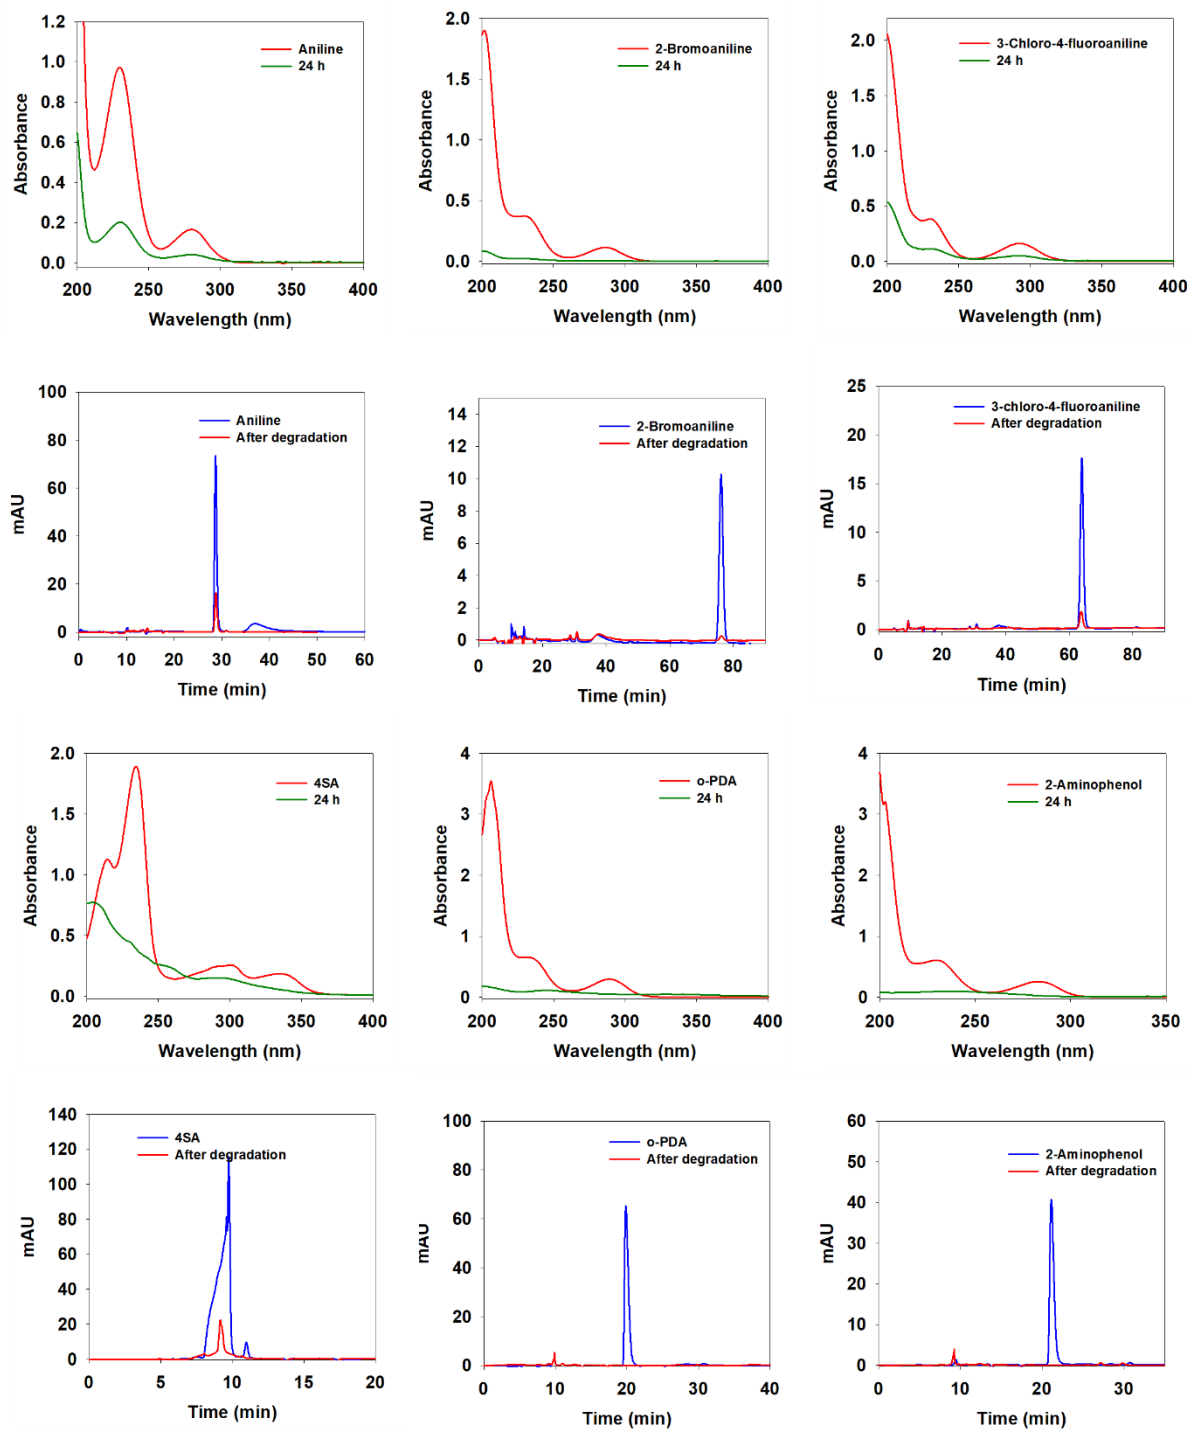

**Figure S7.** UV-Vis spectra and HPLC of aromatic amines (100 mg/L) and after degradation using visible light at pH 7.0 in presence of  $g\text{-C}_3\text{N}_4/\text{Fe}_3\text{O}_4/p\text{-RuNP}$  nanocatalyst (80 mg/L).

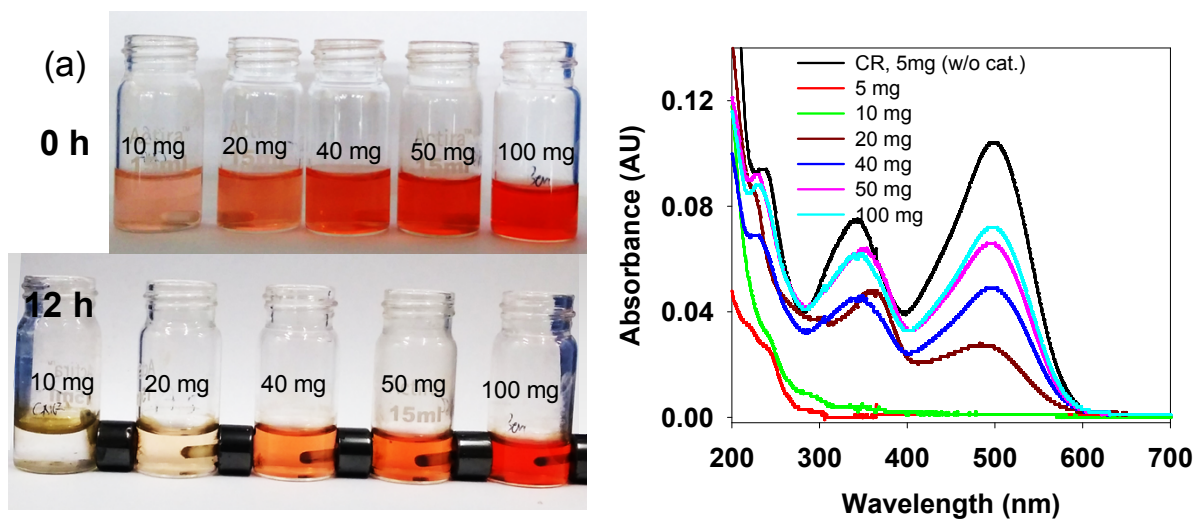

**Figure S8.** Photograph of CR dye of varying concentration (a) before and (b) after photodegradation (12 h) by  $g\text{-C}_3\text{N}_4/\text{Fe}_3\text{O}_4/p\text{-RuNP}$  nanocomposite and (c) the corresponding UV-Vis spectra.

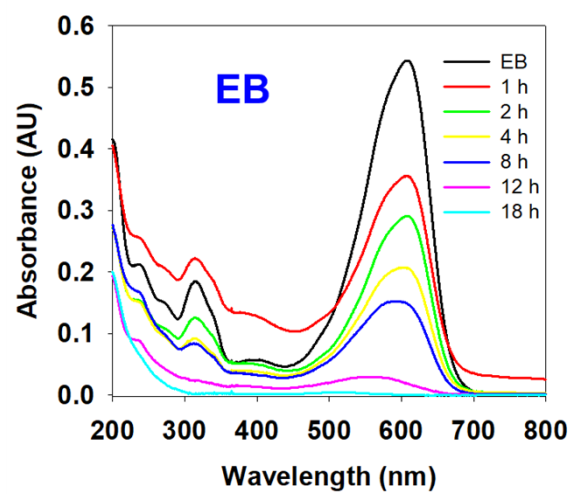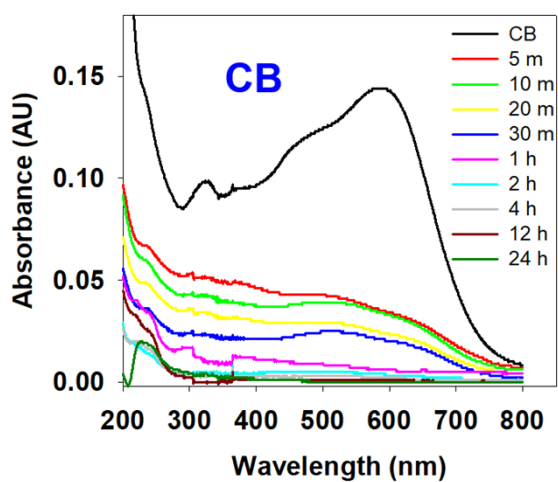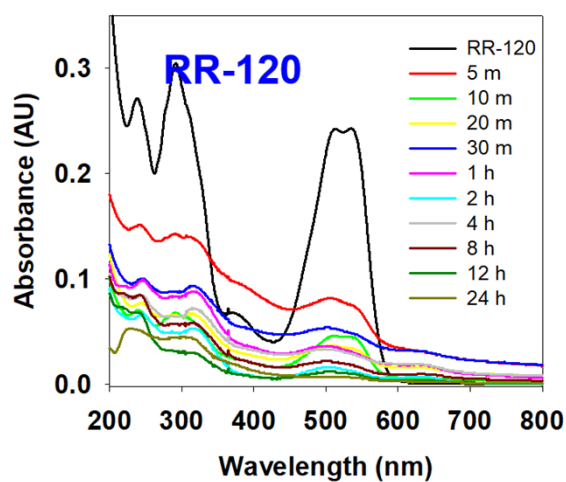

**Figure S9.** UV-Vis spectra of degradation of various azo dyes (5 mg/L) under LED in presence of  $g\text{-C}_3\text{N}_4/\text{Fe}_3\text{O}_4/p\text{-RuNP}$  nanocatalyst (80 mg/L).



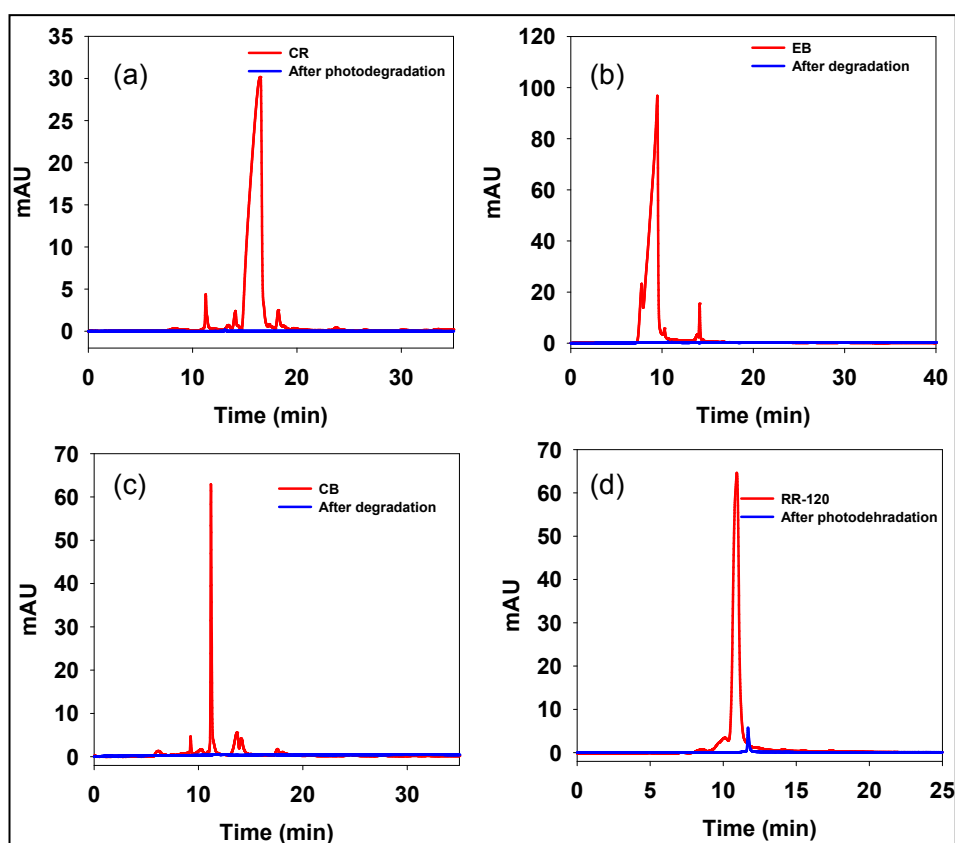

**Figure S10.** HPLC of azo-dyes (5 mg/L) after and before the degradation using visible light at pH 7.0 in presence of  $g\text{-C}_3\text{N}_4/\text{Fe}_3\text{O}_4/p\text{-RuNP}$  (80 mg/L) nanocatalyst.

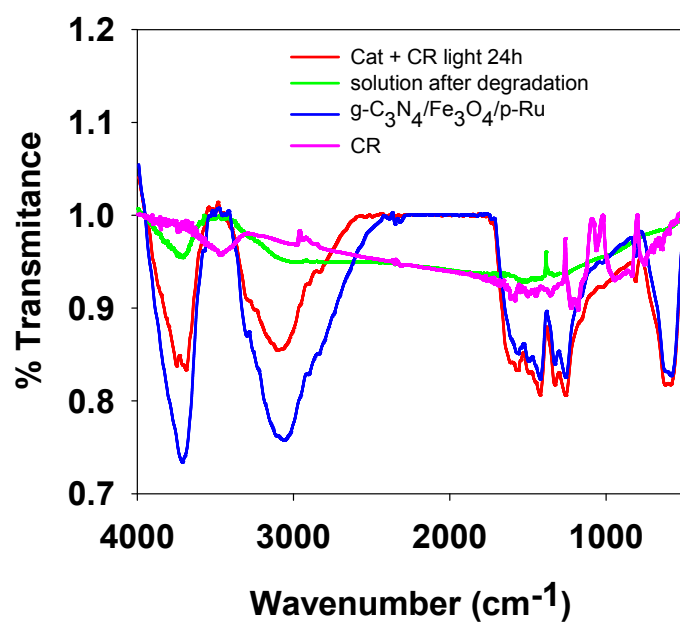

**Figure S11.** FTIR spectra of CR, *g*-C<sub>3</sub>N<sub>4</sub>/Fe<sub>3</sub>O<sub>4</sub>/*p*-RuNP nanocatalyst before and after photo-degradation of CR and the solution after complete degradation of CR.

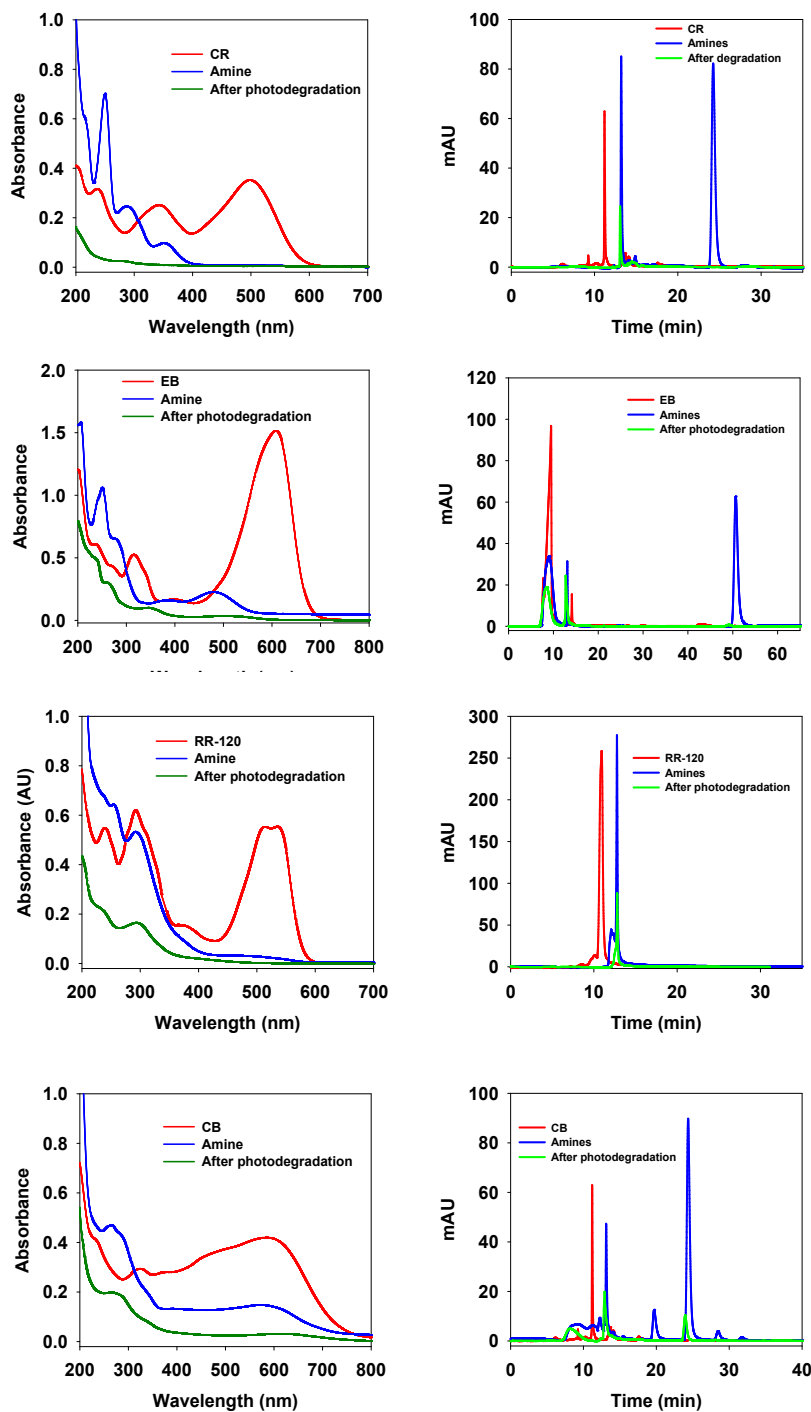

**Figure S12.** (a, c, e and g) UV-Vis spectra of azo dyes before (i), after(ii) reduction and after photo-degradation (iii); (b, d, f and h) HPLC of aromatic amines of reduced dyes (200 mg/L) after and before degradation using visible light at pH 7.0 in presence of  $g\text{-C}_3\text{N}_4/\text{Fe}_3\text{O}_4/p\text{-RuNP}$  nanocatalyst (80 mg/L).

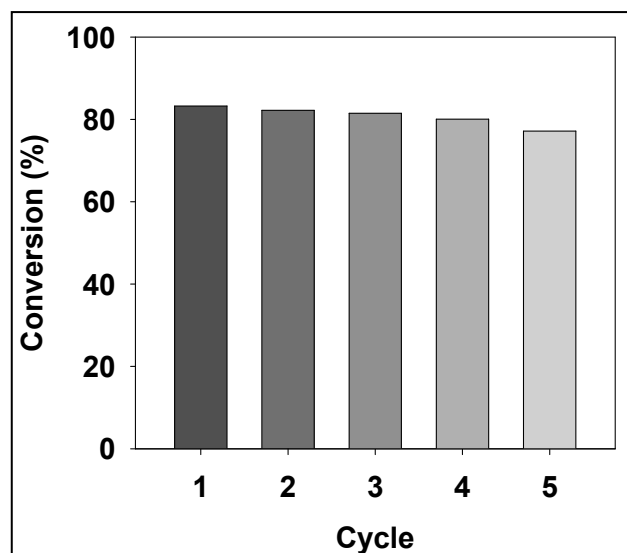

**Figure S13.** Reusability of  $g\text{-C}_3\text{N}_4/\text{Fe}_3\text{O}_4/p\text{-RuNP}$  nanocatalyst towards aniline (100 mg/L) degradation under visible (LED) light.

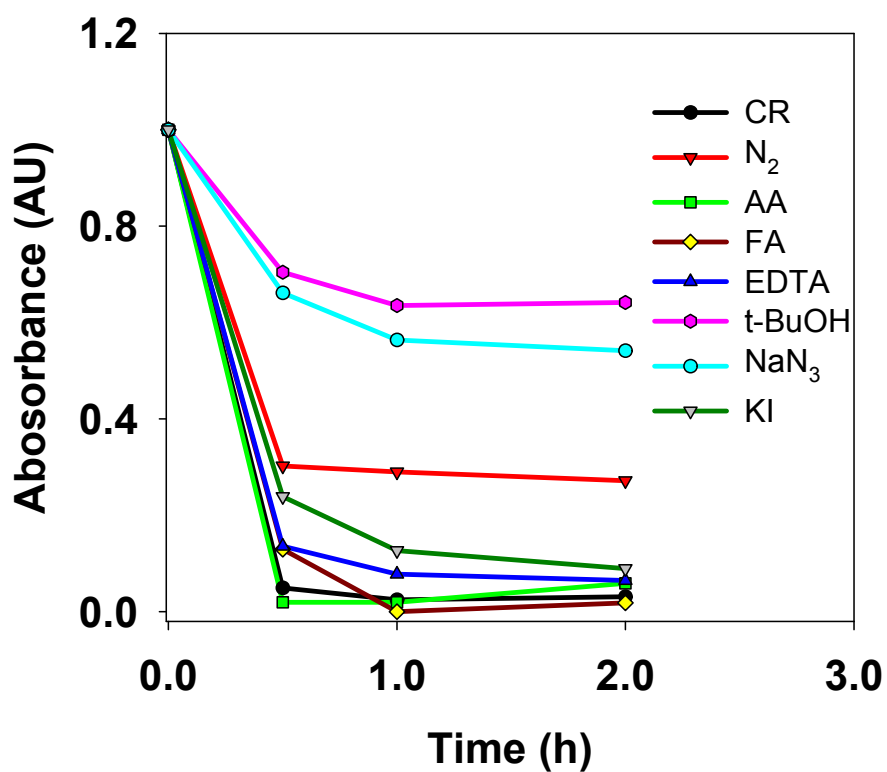

**Figure S14.** (a) UV-Vis spectra of congo red (CR) after treatment of  $g\text{-C}_3\text{N}_4/\text{Fe}_3\text{O}_4/p\text{-RuNP}$  nanocatalyst in the presence of different radical scavengers under LED light.

## References:

- 1 I. Casero, D. Sicilia, S. Rubio and D. Pérez-Bendito, *Water Res.*, 1997, **31**, 1985–1995.
- 2 V. López-Grimau, M. Riera-Torres, M. López-Mesas and C. Gutiérrez-Bouzán, *Color. Technol.*, 2013, **129**, 267–273.
- 3 A. Kumar Verma, P. Bhunia, A. K. Verma and R. R. Dash, *Adv. Environ. Res.*, 2014, **3**, 293–306.
- 4 A. M. Klibanov and E. D. Morris, *Enzyme Microb. Technol.*, 1981, **3**, 119–122.
- 5 E. Yilmaz, S. Memon and M. Yilmaz, *J. Hazard. Mater.*, 2010, **174**, 592–597.
- 6 E. Akceylan, M. Bahadir and M. Yilmaz, *J. Hazard. Mater.*, 2009, **162**, 960–966.
- 7 A. Sahoo, S. K. Tripathy, N. Dehury and S. Patra, *J. Mater. Chem. A*, 2015, **3**, 19376–19383.
- 8 A. Sahoo and S. Patra, *ACS Appl. Nano Mater.*, 2018, **1**, 5169–5178.
